# Supplementary material for: Moderate drought causes dramatic floral transcriptomic reprogramming to ensure successful reproductive development in Arabidopsis
Source: PubMed Central journal article supplement (PMC4067085; doi:10.1186/1471-2229-14-164), 2014-06-13

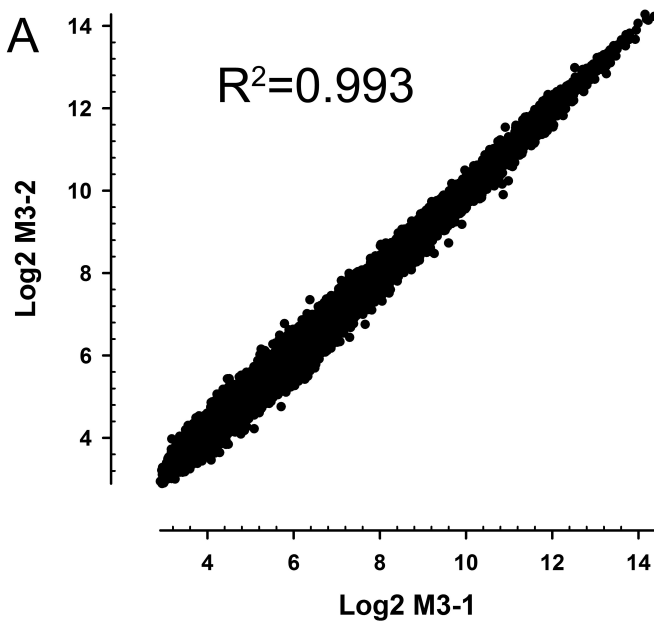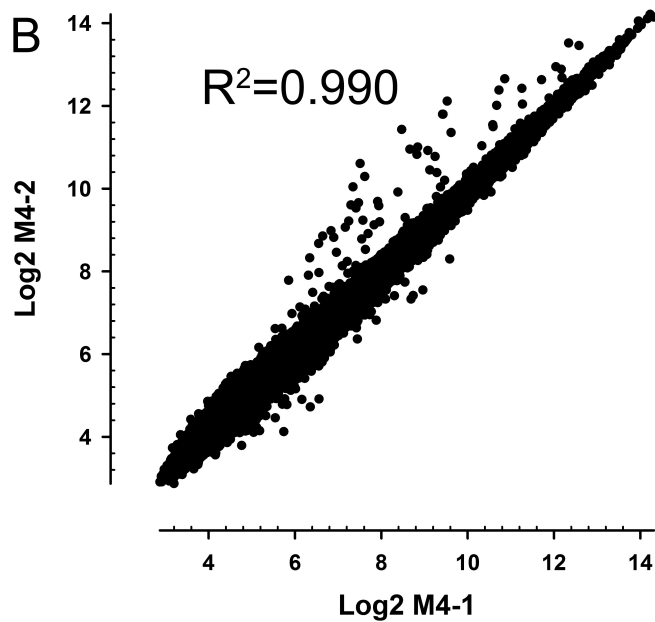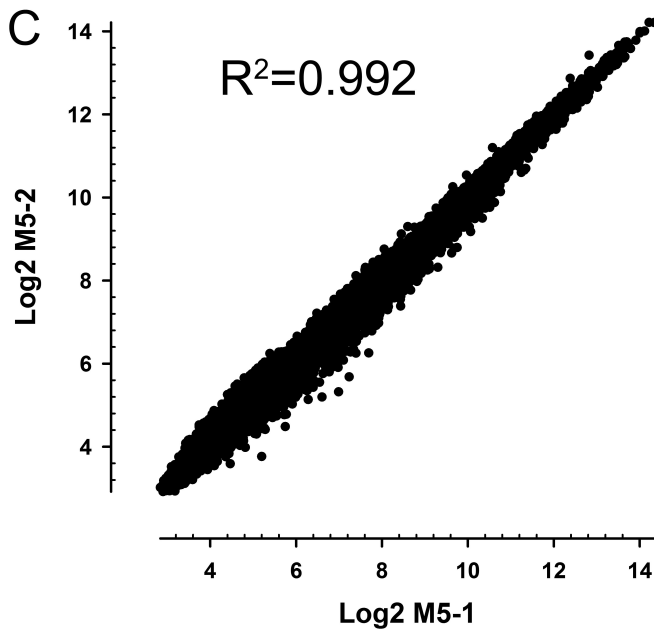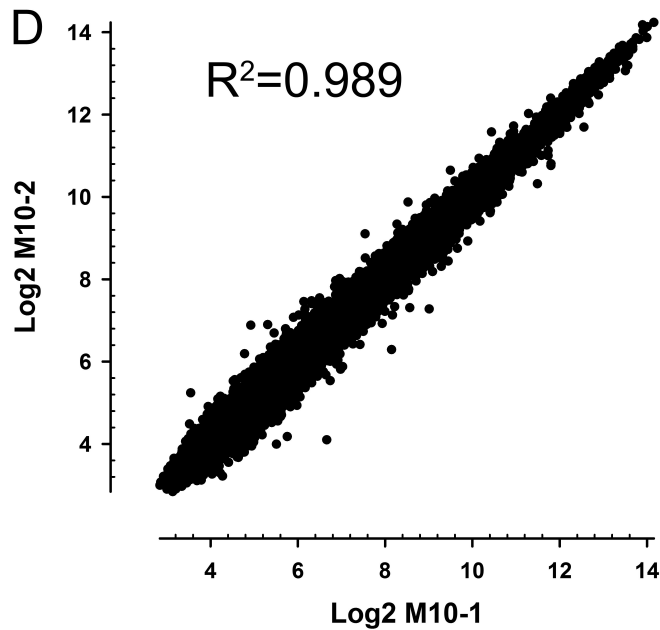

Supplement: 1471-2229-14-164-S1.pdf [file 1471-2229-14-164-S1.pdf]
